# Supplementary material for: Hemocompatible, antioxidative and antibacterial polypropylene prepared by attaching silver nanoparticles capped with TPGS
Source: Royal Society of Chemistry journal article supplement (doi:10.1039/c5tb01554e), 2015-01-01
Supplement: c5tb01554e1.pdf [file c5tb01554e1.pdf]

Supporting Information Available

**Hemocompatible, Anti-oxidative and Antibacterial  
Polypropylene by Attaching Silver Nanoparticles Capped  
with TPGS**

**Chunming Li<sup>a, b</sup>, Bing Cai<sup>c</sup>, Jing Jin<sup>\*a</sup>, Jingchuan Liu<sup>a</sup>, Xiaodong Xu<sup>d</sup>,  
Jinghua Yin<sup>\*a</sup>**

<sup>a</sup> State Key Laboratory of Polymer Physics and Chemistry, Changchun Institute of Applied Chemistry, Chinese Academy of Sciences, Changchun 130022, PR China

<sup>b</sup> University of Chinese Academy of Sciences, Beijing 100049, PR China

<sup>c</sup> School of Chemistry and Materials Science, Liaoning Shihua University, Fushun 113001, P R China;

<sup>d</sup> Polymer Materials Research Center, College of Materials Science and Chemical Engineering, Harbin Engineering University, Harbin 150001, PR China

*\* Corresponding author: Fax: +86-431-85262126; Tel: +86-431-85262109;*

*E-mail: [jjin@ciac.ac.cn](mailto:jjin@ciac.ac.cn); [yinhj@ciac.ac.cn](mailto:yinhj@ciac.ac.cn)*

## 1 Quantitative Data of Fluorescence Intensity on the Surface

The quantitative data of fluorescence intensity from CLSM is shown in Figure S1. The intensity of virgin and Ag NPs treated PP was similar and very high. After grafting, the intensity decreased to 750, a half of PP. While the intensity was only 188 for Ag NPs treated PP-g-P(NIPAAm-*co*-APMA). 90% of Fib was decreased for Ag NPs treated PP-g-P(NIPAAm-*co*-APMA) compare to virgin PP. The results clearly indicated that Ag NPs treated grafting PP prevented the absorption of protein on the surface.

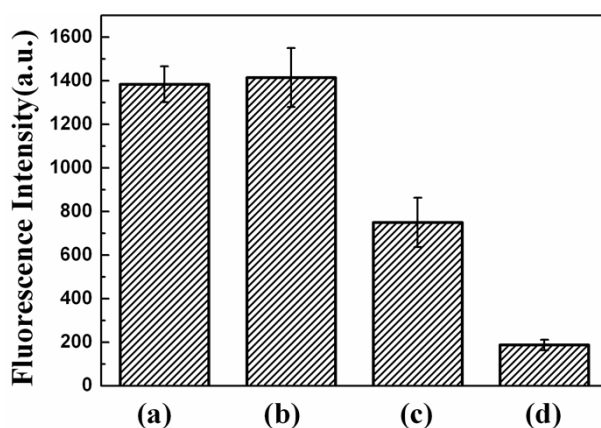

**Figure S1.** Fluorescenc Intensity of FITC-Fib absorbed on the surface of (a) virgin PP, (b) Ag NPs absorbed surface of virgin PP, (c) PP-g-P(NIPAAm-*co*-APMA) and (d) Ag NPs absorbed surface of PP-g-P(NIPAAm-*co*-APMA)

## 2 SEM Analysis of Erythrocytes.

The morphology changes in erythrocytes were also investigated by SEM when Ag NPs absorbed PP membranes contacted with blood (Figure S2). The results were corresponding with CLSM. The pointed stars observed from CLSM were clearly shown in SEM. Most of the erythrocytes maintained their normal discoid shapes and

sizes for Ag NPs absorbed PP because of the present of the TPGS, while most of erythrocytes were transformed into echinocytes for unabsorbed samples.

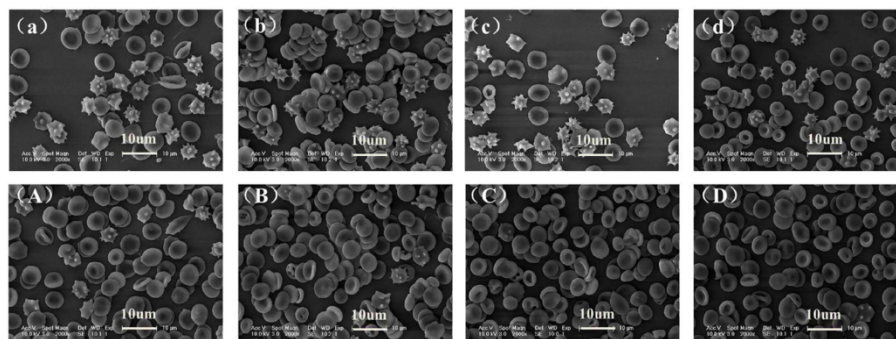

**Figure S2.** CLSM images of RBCs of (a) PP-g-P(NIPAAm) and (b-d) PP-g-P(NIPAAm-co-APMA) with  $M_{\text{NIPAAm}} : \text{APMA} = 2:1, 5:1$  and  $10:1$  and Ag NPs absorbed surface of (A) PP-g-P(NIPAAm), (B-D) PP-g-P(NIPAAm-co-APMA) with  $M_{\text{NIPAAm}} : \text{APMA} = 2:1, 5:1$  and  $10:1$ .

### 3 Bacteria Adhesion of *S. aureus*

The anti-adhesion property of modified PP was also investigated by *S. aureus*, which is one of typical Gram-positive bacteria. A few of *S. aureus* were observed on virgin PP and Ag NPs absorbed surface of virgin PP after incubation in PBS (Figure S3a and b). A large number of *S. aureus* were found on the surface of PP-g-P(NIPAAm-co-APMA) due to electrostatic attraction between positively charged APMA and negatively charged *S. aureus* (Figure S3c). While there were no *S. aureus* observed on the surface of Ag NPs absorbed PP-g-P(NIPAAm-co-APMA). The results showed that Ag NPs on the surface prevented *S. aureus* adhesion at the early stage and were correspondence with Gram-negative bacteria.

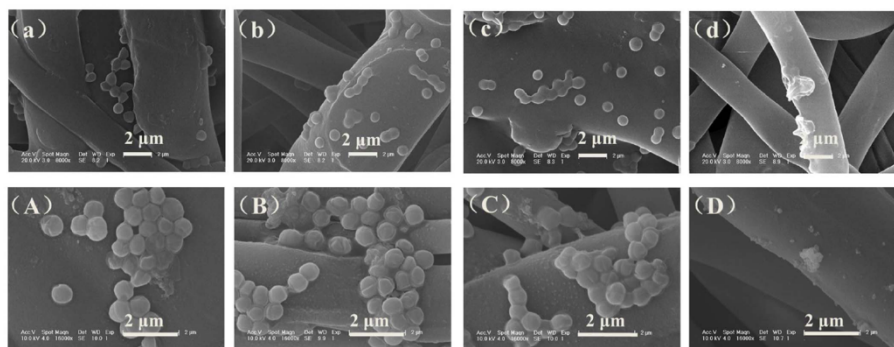

**Figure S3.** SEM images of *S. aureus* adhered on the surface (a-d) and incubated on the surface for 24 h (A-D) of (a and A) virgin PP, (b and B) Ag NPs absorbed surface of virgin PP, (c and C) PP-g-P(NIPAAm-co-APMA) and (d and D) Ag NPs absorbed surface of PP-g-P(NIPAAm-co-APMA).

#### 4 Bactericidal Activity of *S. aureus*

Figure S4 shows bacterial colony forming units (CFU) of *S. aureus* grown on culture plates for virgin PP and modified PP. The plates of virgin PP (Figure S4a) and Ag NPs treated virgin PP (Figure S4b) and PP-g-P(NIPAAm-co-APMA) were covered with a higher number density of bacterial colonies. While Ag NPs absorbed surface of PP-g-P(NIPAAm-co-APMA) can efficiently inhibit the growth of *S. aureus*. The result shows the effective antibacterial properties of Ag NPs treated surface.

#### 5 Biofilm formation of *S. aureus*

Figure S3(A-D) showed biofilms formation of *S. aureus* on virgin and modified PP. *S. aureus* formed biofilms on virgin PP (Figure S3A) and Ag NPs treated virgin PP (Figure S3B). For PP-g-P(NIPAAm-co-APMA) (Figure S3C), some bacteria exhibited membrane wrinkling due to of the positive charge of APMA. While for Ag NPs absorbed PP-g-P(NIPAAm-co-APMA) (Figure S3D), only few of bacteria

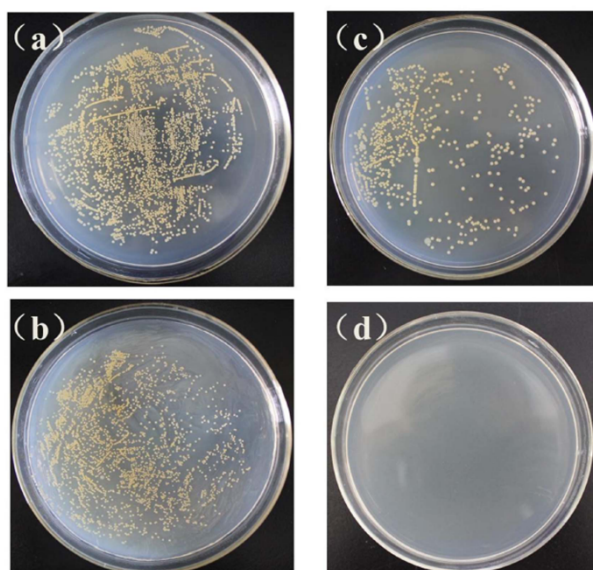

**Figure S4.** Photographs of agar plates corresponding to the *S. aureus* suspension recovered from (a) virgin PP, (b) Ag NPs absorbed surface of virgin PP, (c) PP-g-P(NIPAAm-co-APMA) and (d) Ag NPs absorbed surface of PP-g-P(NIPAAm-co-APMA).

absorbed on the surface and most of the bacteria were dead. The above results indicated that Ag NPs on the surface inhibited the formation of biofilm and killed most of the *S.aureus* on the grafting surface.
